# Supplementary material for: A minimal ubiquitous chromatin opening element (UCOE) effectively prevents silencing of juxtaposed heterologous promoters by epigenetic remodeling in multipotent and pluripotent stem cells
Source: PubMed Central journal article supplement — Nucleic Acids Res. 2015 Jan 20;43(3):1577–92. doi: 10.1093/nar/gkv019 (PMC4330381; doi:10.1093/nar/gkv019), 2015-01-20
Supplement: supp_gkv019_nar-02332-h-2014-File008.pdf [file supp_gkv019_nar-02332-h-2014-File008.pdf]

Figure S1

A

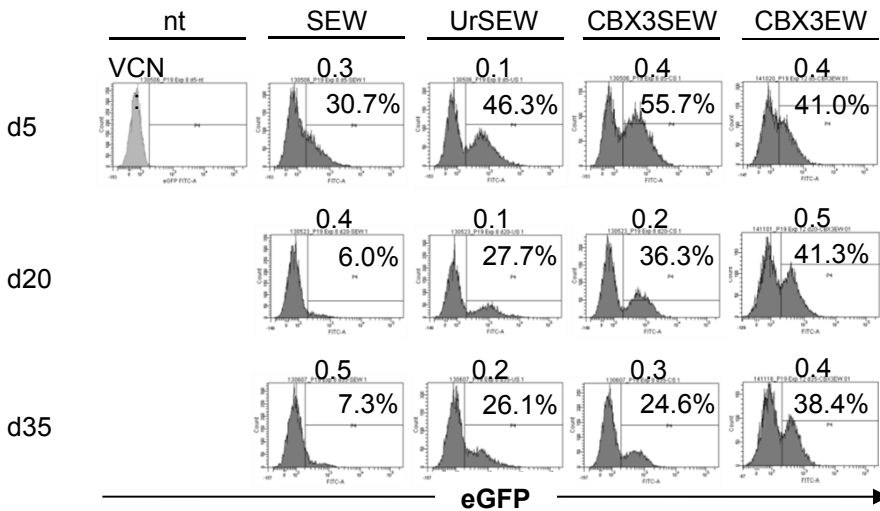

B

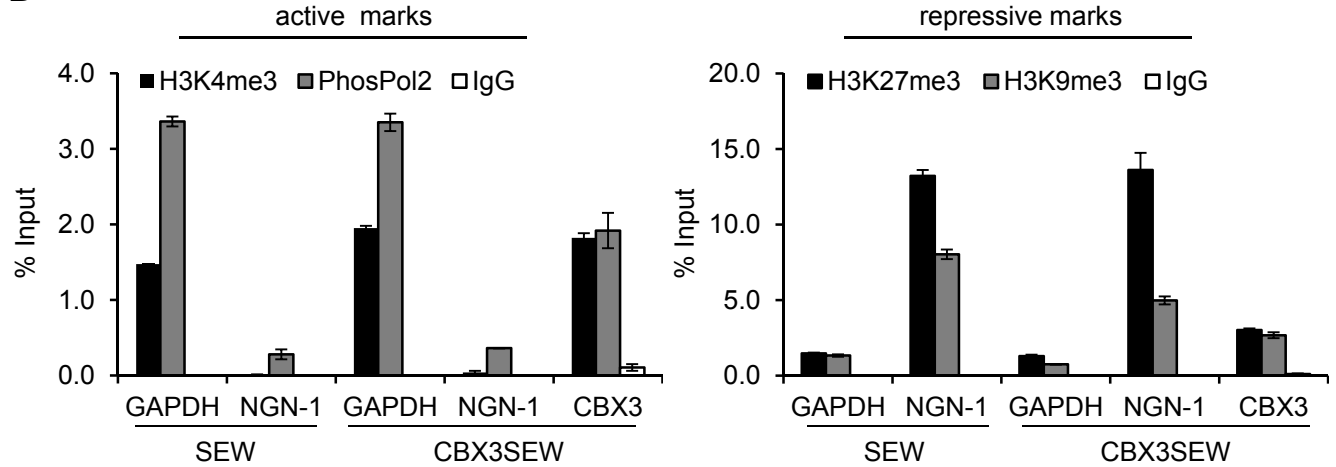

**Figure S1. The CBX3-UCOE stabilizes transgene expression in the murine embryonic carcinoma cell line P19.** (A) P19 cells were transduced with SEW, UrSEW, CBX3SEW and CBX3EW. EGFP expression was monitored over time by flow cytometry and VCN was determined in unsorted cells by qRT-PCR. (B) Active and repressive chromatin marks were quantified 35 days after transduction by CHIP experiments at control regions within the actively transcribed GAPDH promoter and the repressed NGN-1 locus in P19 cells. These experiments served as control for the data shown in Figure 2C. In CBX3SEW transduced cells also the chromatin status of the CBX3-UCOE within the vector was analyzed in parallel (representative results shown, n=2, mean  $\pm$  S.D).

Figure S2

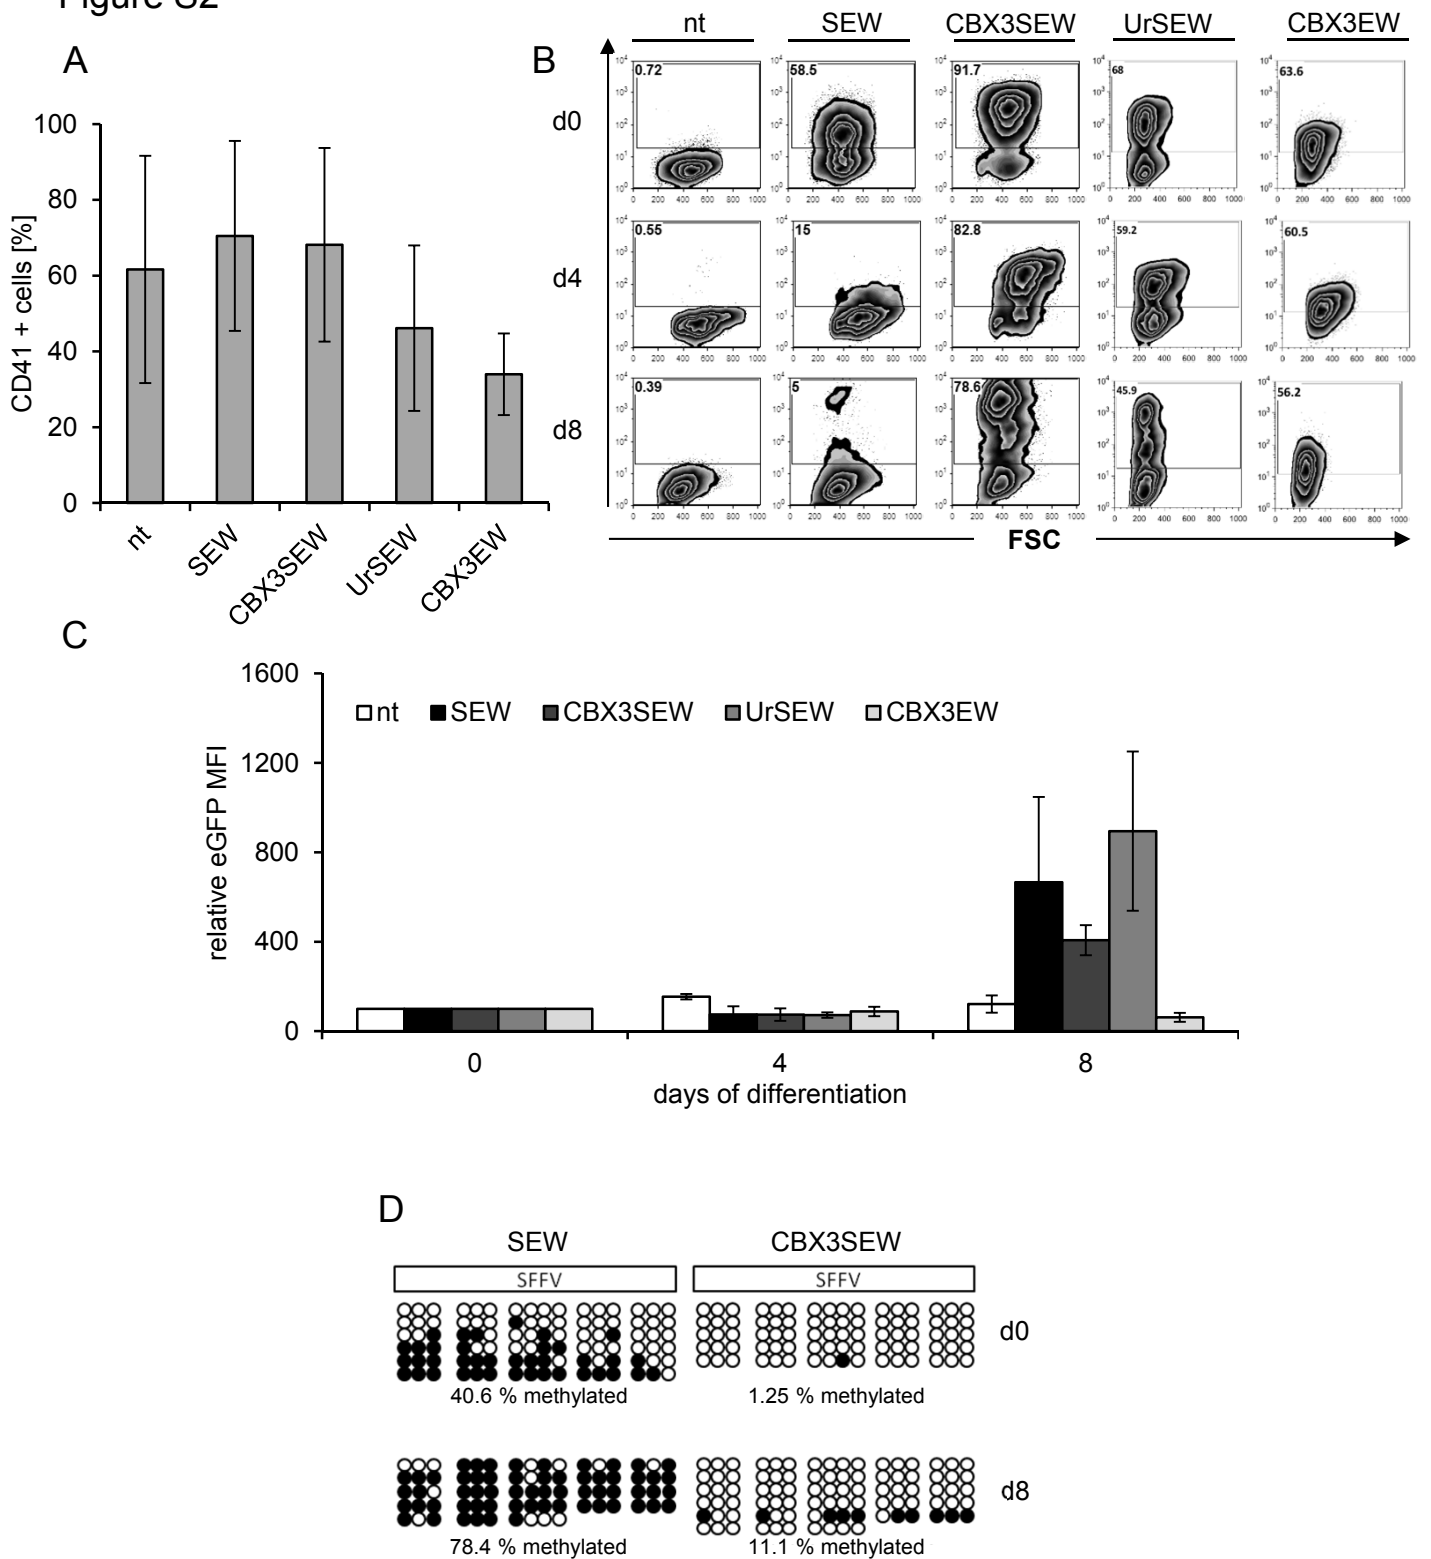

**Figure S2. The CBX3-UCOE mediates stable transgene expression during hematopoietic differentiation of murine ES-cells (CCE).** Murine ESCs were transduced with SEW, CBX3SEW, URSEW and CBX3EW lentiviral vectors and differentiated towards hematopoietic stem/progenitor cells following an EB-based protocol. **(A)** Expression of the early hematopoietic marker CD41 was analyzed at day 8 after transduction and differentiation (n=4, mean  $\pm$  S.D.). **(B)** Transgene expression was analyzed by flow cytometry at day 0, 4 and 8 of differentiation (n=3, representative experiment shown). **(C)** MFI of eGFP positive cells determined by flow cytometry. Values at days 4 and 8 are given in comparison to the MFI at day 0 (n=3, mean  $\pm$  S.D.). **(D)** DNA methylation at the SFFV promoter was analyzed using bisulfite PCR in non-differentiated cells (d0) and their hematopoietic progeny (d8).

Figure S3

Sequence alignment of wt CBX3 and CBX3\*

*Sma*I

```
wt | GGGAGGTGGTCCCTGCAGTTACGCCAATGATAACCCCGCCAGAAAAATCTTAGTAGCCT 60
mut | GGGAGGTGGTCCCTGCAGTTACGCCAATGATAACCCCGCCAGAAAAATCTTAGTAGCCT 60
    | *****

wt | TCCCTTTTTGTTTTCCGTGCCCAACTCGGGCGGATTGACTCGGCCCTTCCGGAAACACC 120
mut | TCCCTTTTTGTTTTCCGTGCCCAACTCGGGCGGATTGACTCGGCCCTTCCGGAAACACC 120
    | *****

wt | CGAATCAACTTCTAGTCAAATTATTGTTACGCCGCAATGACCCACCCCTGGCCCGCGTC 180
mut | CGAATCAACTTCTAGTCAAATTATTGTTACGCCGCAATGACCCACCCCTGGCCCGCGTC 180
    | *****

wt | TGTGGAAGTACCCCTGGTGTACAGGAGAGTTCGCTGCTGAAAGTGGTCCCAAAGGGGTA 240
mut | TGTGGAAGTACCCCTGGTGTACAGGAGAGTTCGCTGCTGAAAGTGGTCCCAAAGGGGTA 240
    | *****

wt | CTAGTTTTTAAGCTCCCAACTCCCCCTCCCCCAGCGTCTGGAGGATTCCACACCCTCGCA 300
mut | CTAGTTTTTAAGCTCCCAACTCCCCCTCCCCCAGCGTCTGGAGGATTCCACACCCTCGCA 300
    | *****

wt | CCGCAGGGGCGAGGAAGTGGGCGGAGTCCGGTTTTGGCGCCAGCCGCTGAGGCTGCCAAG 360
mut | CCGCAGGGGCGAGGAAGTGGGCGGAGTCCGGTTTTGGCGCCAGCCGCTGAGGCTGCCAAG 360
    | *****

wt | CAGAAAAGCCACCGCTGAGGAGACTCCGGTCACTGTCCTCGCCCCGCTCCCCCTTCCCT 420
mut | CAGAAAAGCCACCGCTGAGGAGACTCCGGTCACTGTCCTCGCCCCGCTCCCCCTTCCCT 420
    | *****

wt | CCCCTTGGGGACCAACGGGCGCCACGCCGGAACGTAAGTGCCGCGGTGCTCGGCGCCT 480
mut | CCCCTTGGGGACCAACGGGCGCCACGCCGGAACGTAAGTGCCGCGGTGCTCGGCGCCT 480
    | *****

wt | CCGCCCTCCCCCTAGGGCCCCAATTCAGCGGGCGGGCGCGGGCCCCCTCCCCCGCC 540
mut | CCGCCCTCCCCCTAGGGCCCCAATTCAGCGGGCGGGCGCGGGCCCCCTCCCCCGCC 540
    | *****

wt | GGGCGCGCGCCCGCTGCCCCGCCCTTCGTGGCCGCCCGGCGTGGGCGGTGCCACCCCTCC 600
mut | GGGCGCGCGCCCGCTGCCCCGCCCTTCGTGGCCGCCCGGCGTGGGCGGTGCCACCCCTCC 600
    | *****

wt | CCCCggggccccgCGCGCAGCTCCCGGCTCCCTCCCCCTTCGGATGTGGCTTGAGCTGT 660
mut | CCCCggggccccgCGCGCAGCTCCCGGCTCCCTCCCCCTTCGGATGTGGCTTGAGCTGT 660
    | *****

wt | AGGCGCGGAGGGCC 674
mut | AGGCGCGGAGGGCC 674
    | *****

    | BsmBI
```

Figure S4

A

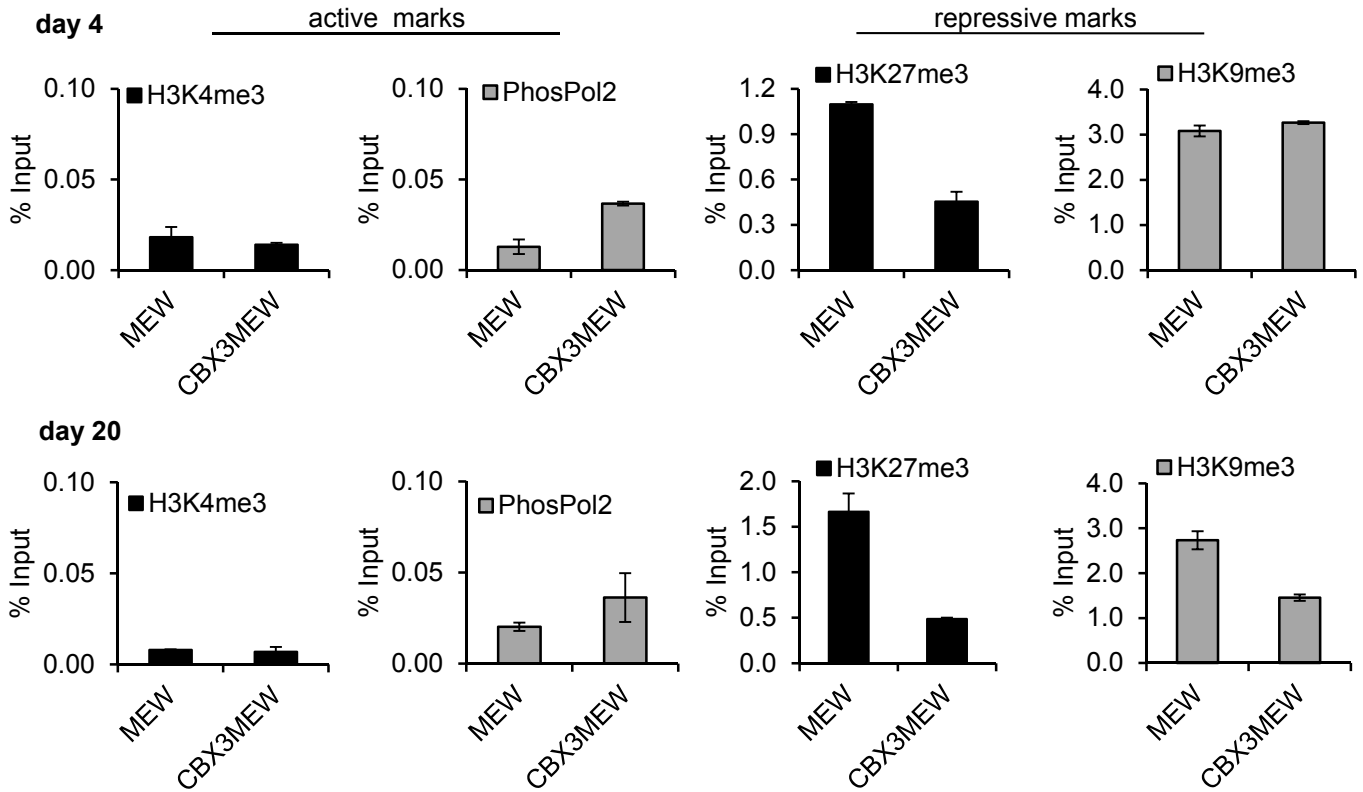

B

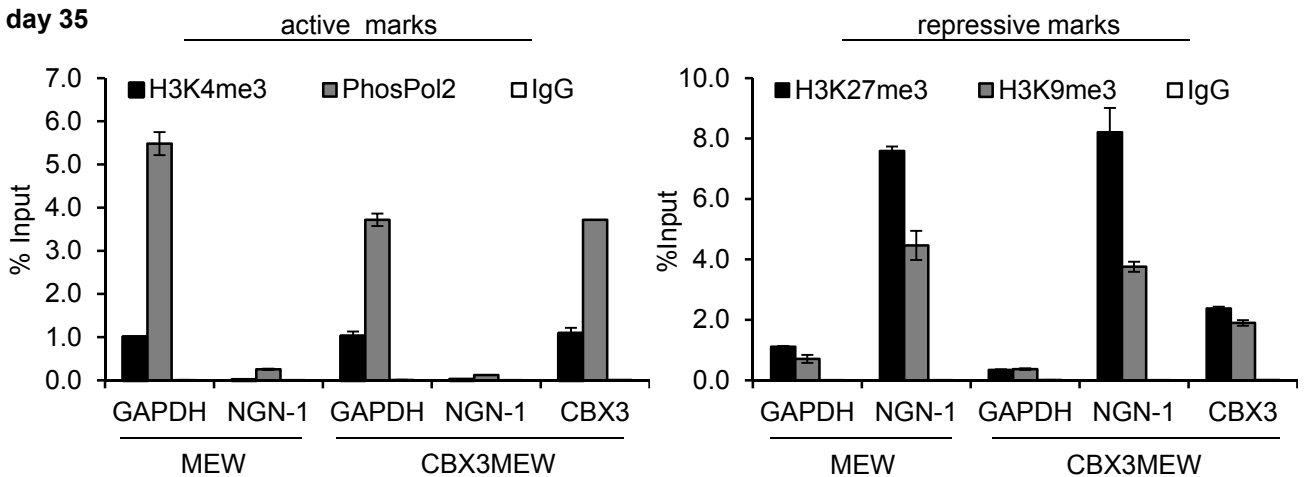

**Figure S4. Chromatin structure at the MRP8 promoter in MEW and CBX3MEW transduced P19 cells. (A)** Active and repressive histone marks at the MRP8 promoter were quantified 4 and 20 days after transduction by chromatin immunoprecipitation (representative results, mean  $\pm$  S.D). **(B)** Active and repressive histone marks were quantified 35 days after transduction by ChIP experiments at control regions within the actively transcribed GAPDH promoter and the repressed NGN-1 locus in P19 cells. In CBX3MEW transduced cells also the chromatin status of the vector-encoded CBX3 promoter was analyzed (representative results shown, n=2, mean  $\pm$  S.D).

Figure S5

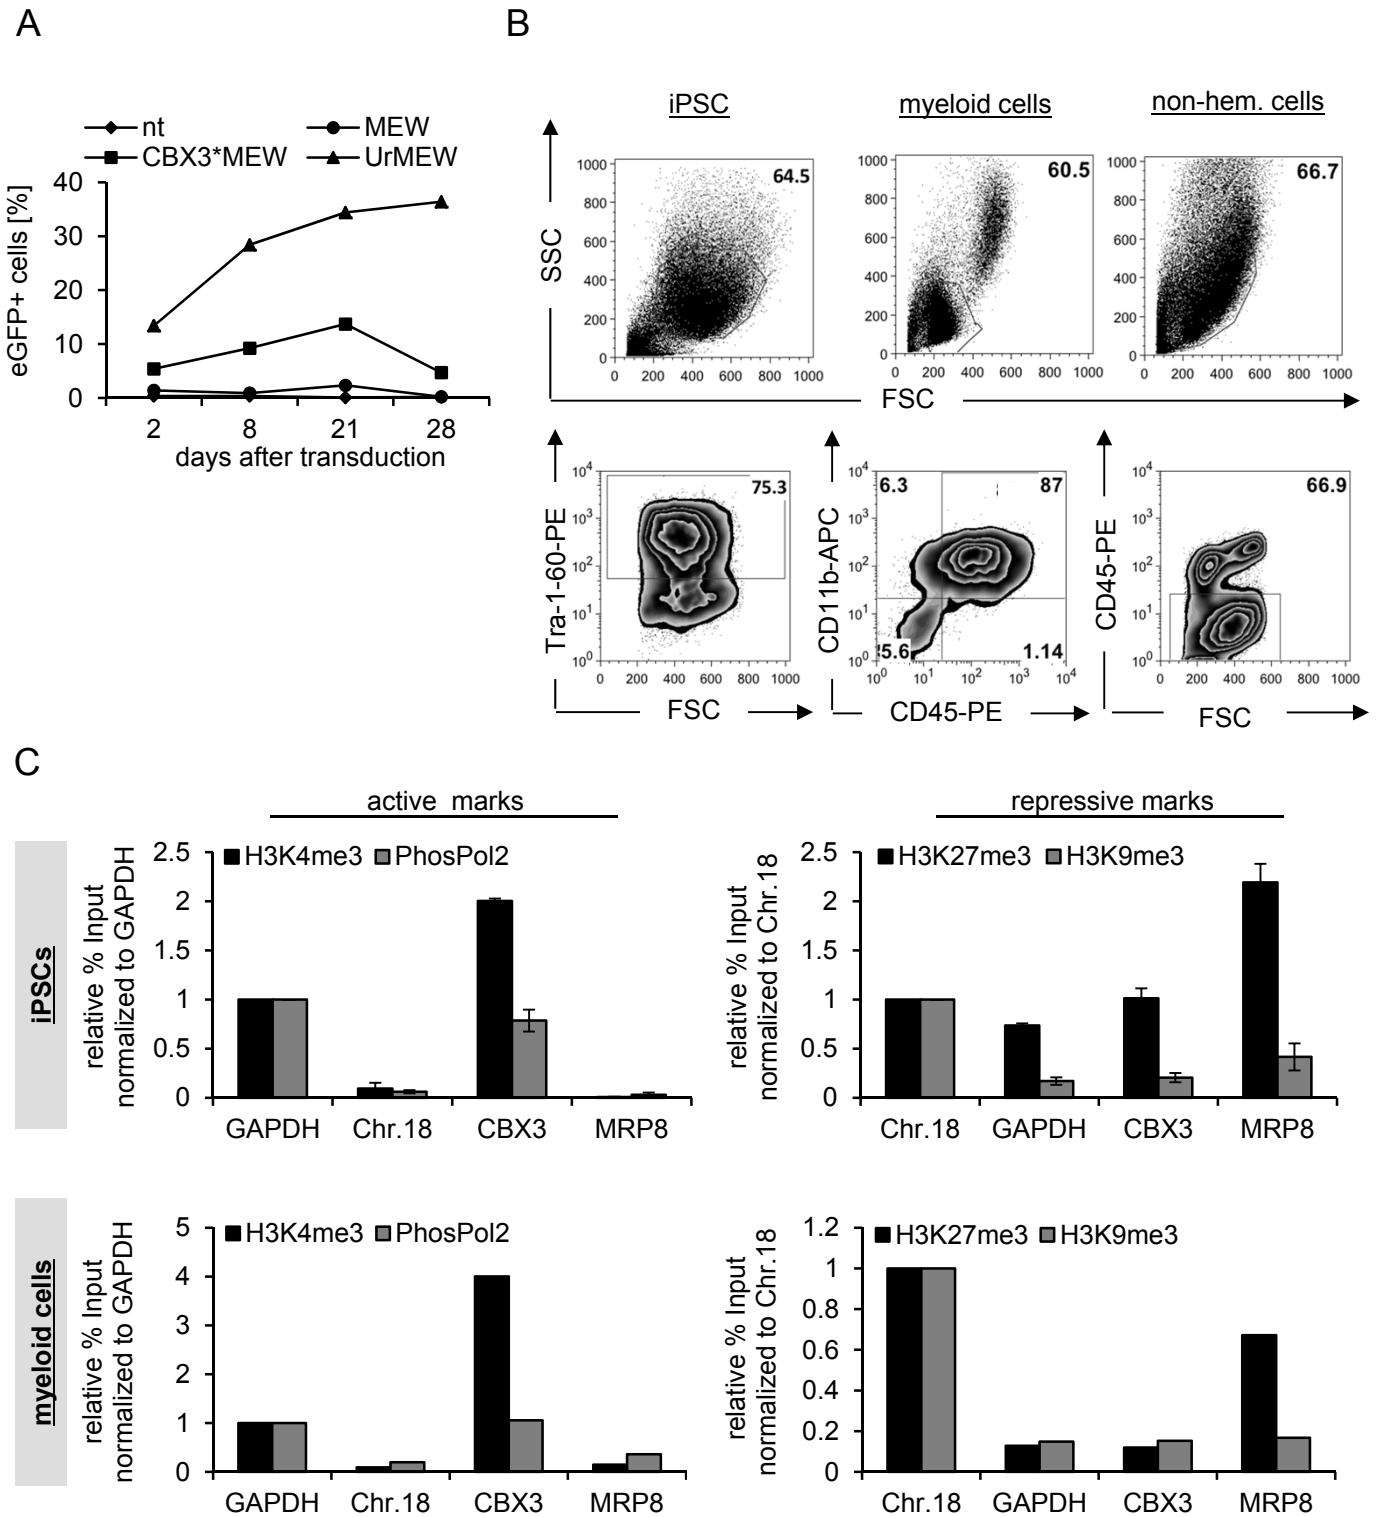

**Figure S5. The CBX3-UCOE stabilizes transgene expression while maintaining tissue-specificity of the MRP8 promoter during myeloid differentiation of hiPSC. (A)** hiPSC were transduced with MEW, CBX3\*MEW and UrMEW and eGFP expression in Tra-1-60<sup>+</sup> cells was analyzed over 25 days by flow cytometry. **(B)** Representative gating strategy for analysis of eGFP<sup>+</sup> positive cells in hiPSC (Tra-1-60<sup>+</sup>), myeloid cells (CD45<sup>+</sup>/CD11b<sup>+</sup>) and non-hematopoietic cells (CD45<sup>-</sup>). **(C)** The chromatin structure of defined regions within the endogenous GAPDH, Chr18, CBX3 and MRP8 loci was analyzed by ChIP experiments in non-transduced hiPSC and differentiated myeloid cells (n=1-2, mean ± S.D). Values are given as percentage of input and normalized to the percentage of input for GAPDH (active chromatin) or Chr.18 (repressive chromatin marks).

Table S1

List of primers used in this study.

| Oligonucleotide     | Application | Sequence                                         |
|---------------------|-------------|--------------------------------------------------|
| m b-act F           | qPCR        | AGAGGGAAATCGTGCGTGAC                             |
| m b-act R           | qPCR        | CAATAGTGATGACCTGGCCGT                            |
| m b-act probe       | qPCR        | TexasRed-CACTGCCGCATCCTCTTCTCCC-3'-BHQ2          |
| h EPOR F            | qPCR        | ATGCCAGACTAGACCCAGAC                             |
| h EPOR R            | qPCR        | GGAAAGGAACTAACAAAGGGAC                           |
| h EPOR probe        | qPCR        | TexasRed-TCTTGGGGACTTTCACCTGATTTTCTTCTAC-3'-BHQ2 |
| CBX3 LAM1           | cLAM PCR    | CCAACTCCCCCTCCCCAG                               |
| CBX3 LAM2           | cLAM PCR    | ATTCCACACCCTCGCACC                               |
| CBX3 LAM3           | cLAM PCR    | CGAGGAAGTGGGCGGAGT                               |
| LC1                 | cLAM PCR    | GACCCGGGAGATCTGAATTC                             |
| LC2                 | cLAM PCR    | GATCTGAATTCAGTGGCACAG                            |
| BS-SFFV F1          | BS PCR      | GTTATTTTGTAAAGGTATGGAAAAATA                      |
| BS-SFFV R1          | BS PCR      | AAAAAATTATAAACTCTTTTATAAAA                       |
| BS-SFFV F2          | BS PCR      | AGGTATGGAAAAATATTAATTAAGA                        |
| BS-CBX3 F1          | BS PCR      | AATTGATTTTTGGTGTATAGGA                           |
| BS-CBX3 R1          | BS PCR      | CTAAAAATTAAACCCTAAAAAAA                          |
| BS-CBX3 F2          | BS PCR      | TGATTTTTGGTGTATAGGAGAG                           |
| m gapdh F           | ChIP        | TCCCCTCCCCCTATCAGTTC                             |
| m gapdh R           | ChIP        | GACCCGCCTCATTTTTGAAA                             |
| m ngn-1 F           | ChIP        | TCCGTTTCTGCGTTTCAA                               |
| m ngn-1 R           | ChIP        | TGCTCTGGGCTGGCTGTC                               |
| h GAPDH F           | ChIP        | GCTACTAGCGGTTTTACGGGCG                           |
| h GAPDH R           | ChIP        | TGCGGCTGACTGTGCAACAGG                            |
| h Chr.18 F          | ChIP        | ACTCCCCTTTCATGCTTCTG                             |
| h Chr.18 R          | ChIP        | AGGTCCCAGGACATATCCATT                            |
| SFFV F              | ChIP        | AATCAGCCTGCTTCTCGCTTCT                           |
| SFFV R              | ChIP        | TGAACAGCTCCTCGCCCTT                              |
| h MRP8 endogenous F | ChIP        | GGTTGAGAAACCAGAGACTGTAGC                         |
| h MRP8 endogenous R | ChIP        | GCTGCCACAGCTTCAG                                 |
| h MRP8 exogenous F  | ChIP        | CAGCTGGCCAAGCCTAAC                               |
| h MRP8 exogenous R  | ChIP        | AACAGCTCCTCGCCCTT                                |
| h CBX3 endogenous F | ChIP        | AGTTCGCTGCTGAAAGTGGT                             |
| h CBX3 endogenous R | ChIP        | GGGGAGTTGGGAGCTTAAAA                             |

## Table S2

**Table S2: Relative MFI of SEW, UrSEW, CBX3SEW and CBX3EW transduced P19 cells.** P19 cells were transduced with the indicated vectors and the MFI of eGFP positive cells was monitored over time by flow cytometry and normalized to day 3 after transduction. Examples of the corresponding FACS data are shown in Figure S1. (n=6, mean  $\pm$  s.e.m.)

| <b>days after transduction</b> | <b>3</b> | <b>7</b>         | <b>15</b>       | <b>17</b>        | <b>21</b>       | <b>32</b>       | <b>35</b>       | <b>42</b>       |
|--------------------------------|----------|------------------|-----------------|------------------|-----------------|-----------------|-----------------|-----------------|
| SEW [MFI $\pm$ s.e.m.]         | 100.0    | 107.5 $\pm$ 9.3  | 59.7 $\pm$ 4.8  | 77.0 $\pm$ 8.8   | 61.0 $\pm$ 7.1  | 49.6 $\pm$ 5.6  | 68.0 $\pm$ 9.6  | 62.1 $\pm$ 7.7  |
| UrSEW [MFI $\pm$ s.e.m.]       | 100.0    | 77.9 $\pm$ 5.6   | 67.0 $\pm$ 5.7  | 69.1 $\pm$ 7.3   | 71.8 $\pm$ 13.6 | 62.4 $\pm$ 7.0  | 72.5 $\pm$ 10.5 | 63.8 $\pm$ 5.2  |
| CBX3SEW [MFI $\pm$ s.e.m.]     | 100.0    | 102.3 $\pm$ 12.9 | 50.7 $\pm$ 5.8  | 83.8 $\pm$ 13.4  | 60.4 $\pm$ 9.3  | 48.4 $\pm$ 6.7  | 62.7 $\pm$ 8.5  | 54.3 $\pm$ 5.7  |
| CBX3EW [MFI $\pm$ s.e.m.]      | 100.0    | 113.5 $\pm$ 13.2 | 88.8 $\pm$ 16.1 | 121.6 $\pm$ 17.2 | 88.4 $\pm$ 16.4 | 75.5 $\pm$ 12.2 | 78.6 $\pm$ 12.4 | 63.9 $\pm$ 10.5 |
